# Supplementary material for: Rapid, Landscape-Scale Assessment of Cyclonic Impacts on Mangrove Forests Using MODIS Imagery
Source: MDPI journal article supplement (doi:10.3390/coasts3030017), 2023-09-15
Supplement: s1 [file s1]

Archive with 1 entries (1 files):
- coasts-2545405-supplementary.pdf
