# Supplementary material for: Rapid, Landscape-Scale Assessment of Cyclonic Impacts on Mangrove Forests Using MODIS Imagery
Source: MDPI journal article supplement (doi:10.3390/coasts3030017), 2023-09-15
Supplement: s1 [file s1 › coasts-2545405-supplementary.pdf]

## Article

# Rapid, Landscape-Scale Assessment of Cyclonic Impacts on Mangrove Forests Using MODIS Imagery

AHM Mainul Islam <sup>1,2</sup> and Timothy J. Assal <sup>1,\*</sup>

<sup>1</sup> Department of Geography, Kent State University, Kent, OH 44242, USA

<sup>2</sup> Current address: Department of Geographical and Sustainability Sciences, University of Iowa, Iowa City, IA 52242, USA; ahmmainul-islam@uiowa.edu

\* Correspondence: tassal@kent.edu; Tel.: +1-(33)-06722046

**Table S1.** Recent cyclones that made landfall in Bay of Bengal (2007–2019) [42].

| Cyclone | Year | Maximum Sustained Wind Speed<br>(km h <sup>-1</sup> ) | Landfall                                                                           |
|---------|------|-------------------------------------------------------|------------------------------------------------------------------------------------|
| Akash   | 2007 | 84                                                    | South Bangladesh coast close to south of Cox's Bazar                               |
| Sidr    | 2007 | 213                                                   | Southern Bangladesh coast                                                          |
| Rashmi  | 2008 | 84                                                    | Bangladesh coast near 89.50E (about 50 km west of Khepupara)                       |
| Bijli   | 2009 | 74                                                    | Bangladesh coast near 22.2 deg. North/long. 91.8 deg east                          |
| Aila    | 2009 | 112                                                   | West Bengal coast close to east of Sagar Island                                    |
| Viyaru  | 2013 | 84                                                    | Bangladesh coast between Chittagong and Feni                                       |
| Komen   | 2015 | 74                                                    | Bangladesh coast near longitude 91.40E                                             |
| Roanu   | 2016 | 84                                                    | Southeast coast of Bangladesh near lat. 22.6 N and long. 91.6 E                    |
| Mora    | 2017 | 112                                                   | Bangladesh coast close to south of Chittagong near 22. 00N/91.90E                  |
| Fani    | 2019 | 212                                                   | Odisha coast close to Puri (near lat. 19.75N and Long. 85.70E)                     |
| Bulbul  | 2019 | 139                                                   | West Bengal Coast close to Sunderban Dhanchi forest near 21.55°N/88.5°E            |
| Sitrang | 2022 | 84                                                    | Bangladesh coast between Tinkona and Sandwip close to Barisal near 22.150N/90.350E |
